# Supplementary material for: The Polar Organizing Protein PopZ Is Fundamental for Proper Cell Division and Segregation of Cellular Content in Magnetospirillum gryphiswaldense
Source: PubMed Central journal article supplement (PMC6414705; doi:10.1128/mbio.02716-18), 2019-03-12
Supplement: mBio.02716-18-sf001.pdf [file mBio.02716-18-sf001.pdf]

**A**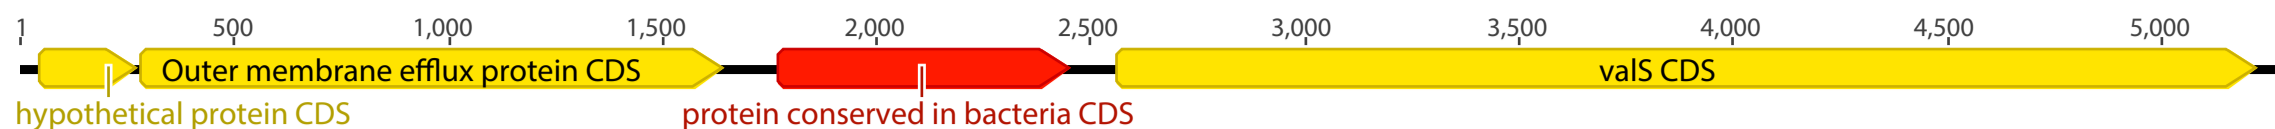**B**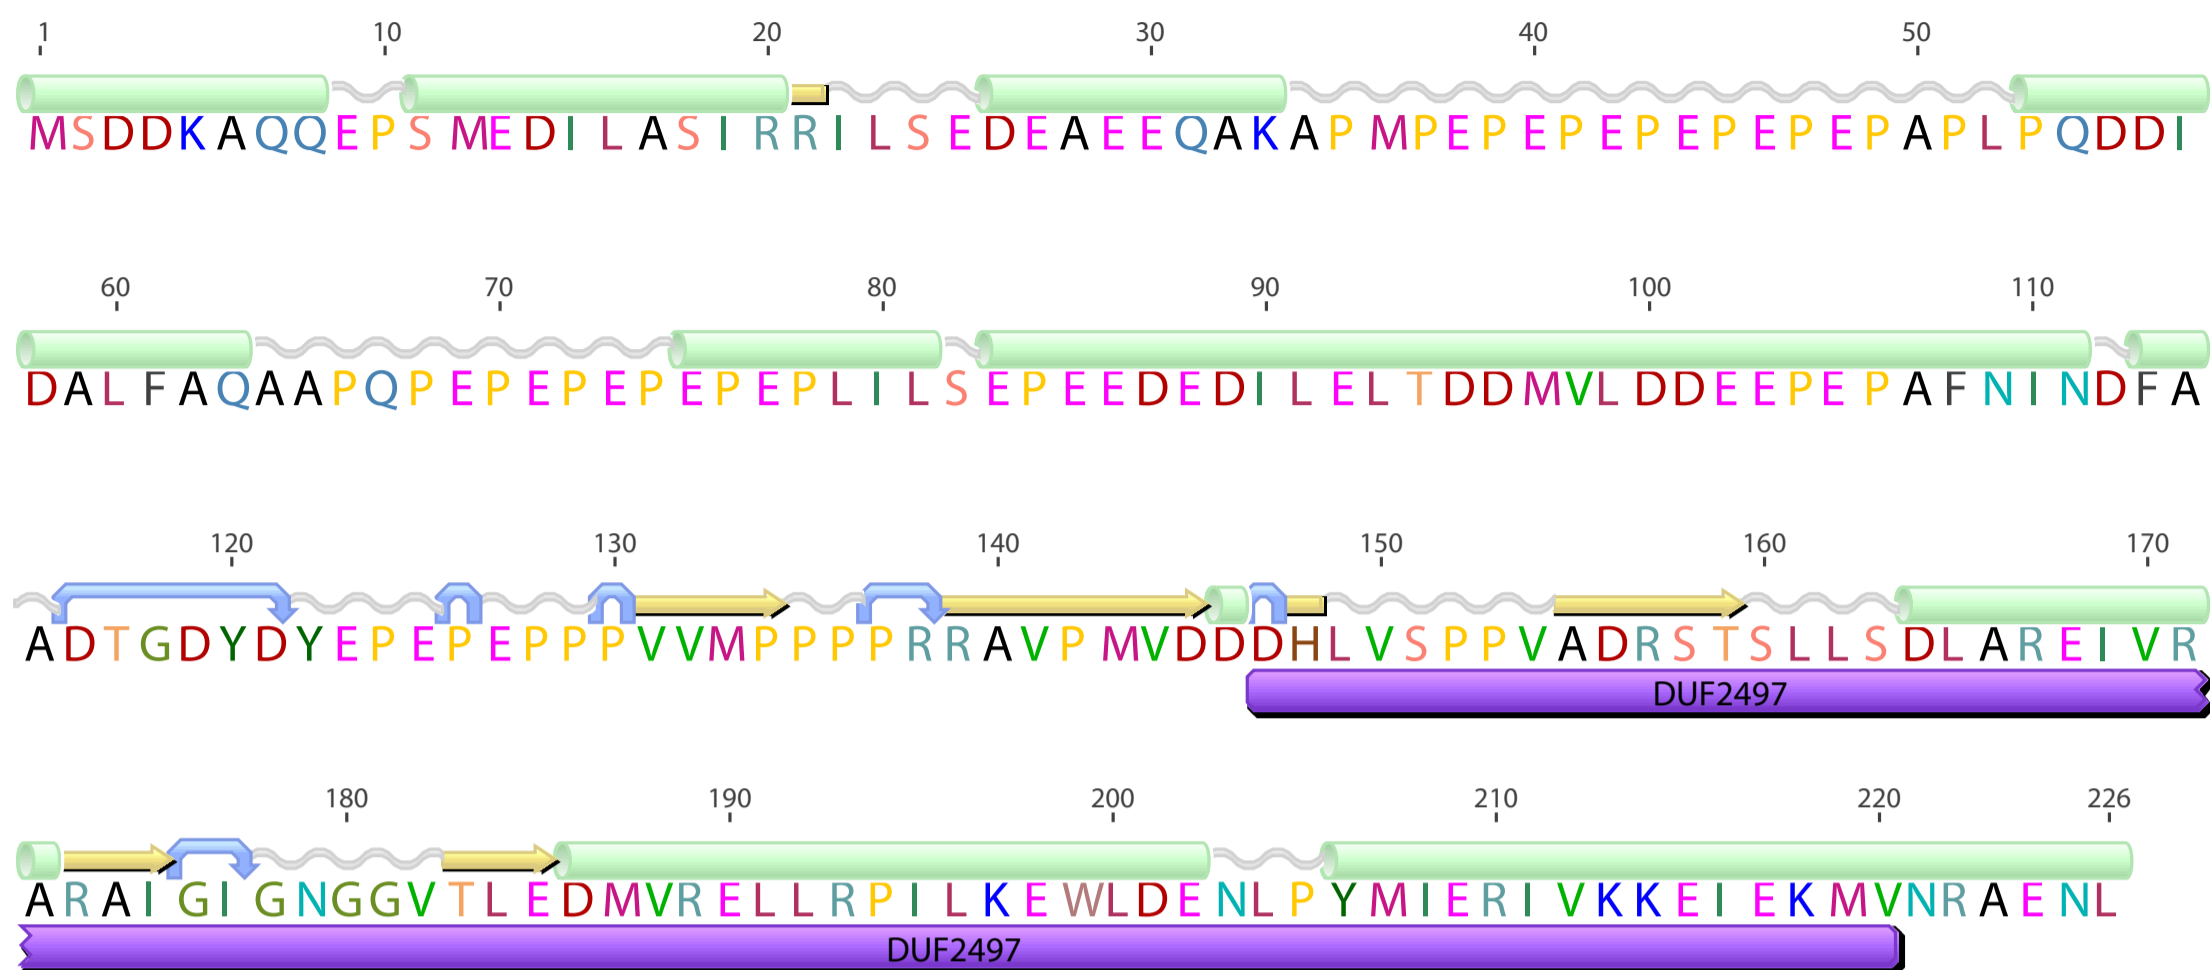**C**

Consensus

1. *Phaeospirillum fulvum*
2. *Phaeospirillum molischianum*
3. *Rhodospirillum rubrum*
4. *Magnetospirillum gryphiswaldense*
5. *Magnetospira* sp.
6. *Magnetospirillum magnetotacticum*
7. *Caulobacter crescentus*
8. *Magnetospirillum magneticum*
9. *Azospirillum brasilense*

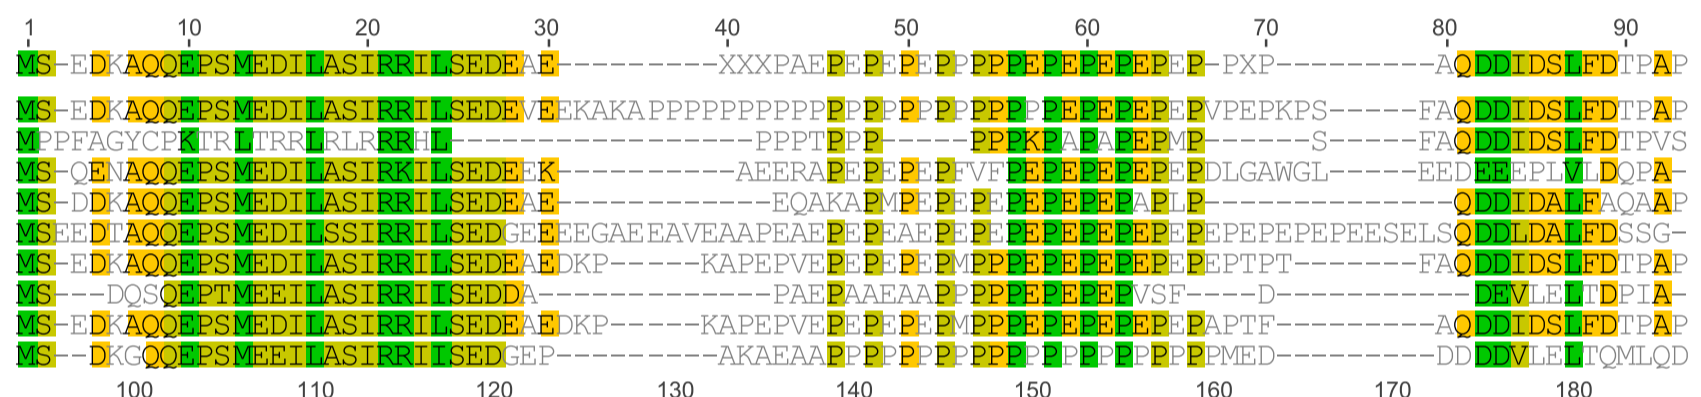

Consensus

1. *Phaeospirillum fulvum*
2. *Phaeospirillum molischianum*
3. *Rhodospirillum rubrum*
4. *Magnetospirillum gryphiswaldense*
5. *Magnetospira* sp.
6. *Magnetospirillum magnetotacticum*
7. *Caulobacter crescentus*
8. *Magnetospirillum magneticum*
9. *Azospirillum brasilense*

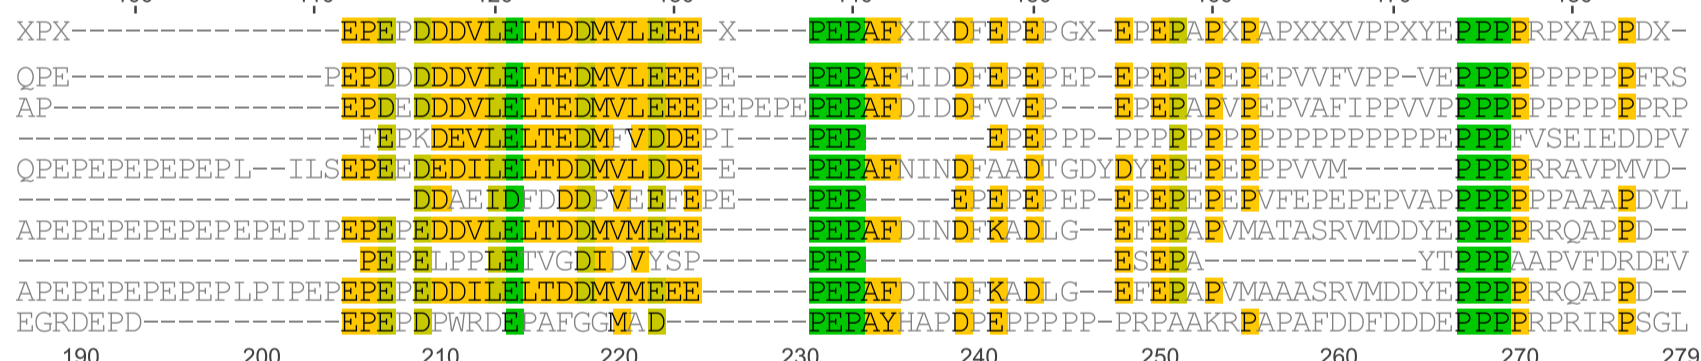

Consensus

1. *Phaeospirillum fulvum*
2. *Phaeospirillum molischianum*
3. *Rhodospirillum rubrum*
4. *Magnetospirillum gryphiswaldense*
5. *Magnetospira* sp.
6. *Magnetospirillum magnetotacticum*
7. *Caulobacter crescentus*
8. *Magnetospirillum magneticum*
9. *Azospirillum brasilense*

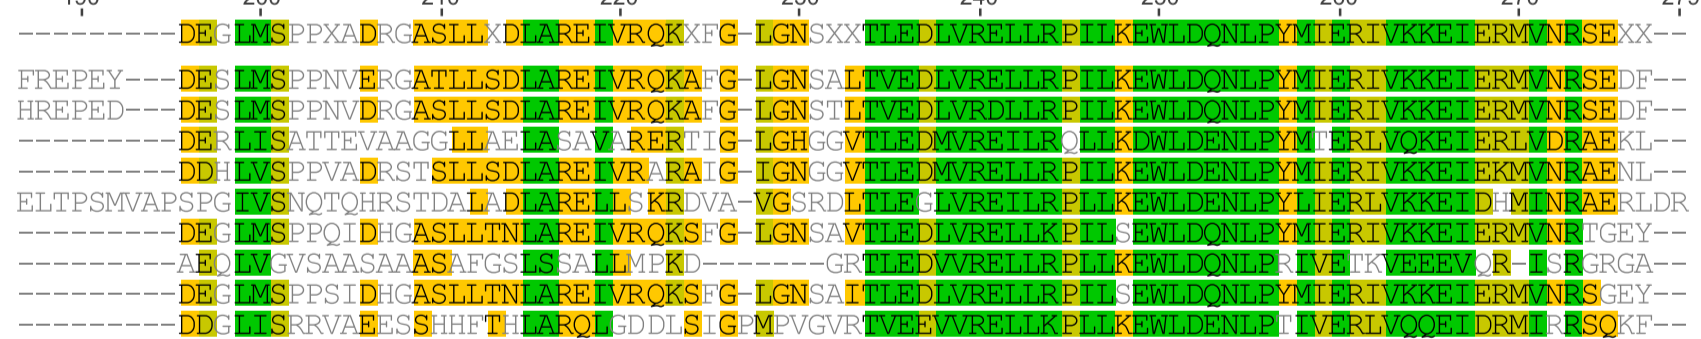**D**

| Identity                                | <i>Phaeospirillum fulvum</i> | <i>Phaeospirillum molischianum</i> | <i>Rhodospirillum rubrum</i> | <i>Magnetospirillum gryphiswaldense</i> | <i>Magnetospira</i> sp. | <i>Magnetospirillum magnetotacticum</i> | <i>Caulobacter crescentus</i> | <i>Magnetospirillum magneticum</i> | <i>Azospirillum brasilense</i> |
|-----------------------------------------|------------------------------|------------------------------------|------------------------------|-----------------------------------------|-------------------------|-----------------------------------------|-------------------------------|------------------------------------|--------------------------------|
| <i>Phaeospirillum fulvum</i>            | 100%                         | 73.50%                             | 47.63%                       | 61.31%                                  | 51.62%                  | 67.61%                                  | 36.79%                        | 67.48%                             | 42.52%                         |
| <i>Phaeospirillum molischianum</i>      | 73.11%                       | 100%                               | 36.81%                       | 51%                                     | 39.91%                  | 56.77%                                  | 30.15%                        | 57.01%                             | 31.62%                         |
| <i>Rhodospirillum rubrum</i>            | 57.70%                       | 49.46%                             | 100%                         | 48.98%                                  | 44.82%                  | 45.78%                                  | 38.38%                        | 45.55%                             | 39.82%                         |
| <i>Magnetospirillum gryphiswaldense</i> | 65.23%                       | 56.98%                             | 59.49%                       | 100%                                    | 48.40%                  | 64.68%                                  | 37.22%                        | 65.81%                             | 41.85%                         |
| <i>Magnetospira</i> sp.                 | 59.13%                       | 46.59%                             | 56.63%                       | 50.89%                                  | 100%                    | 45.80%                                  | 36.01%                        | 45.58%                             | 38.47%                         |
| <i>Magnetospirillum magnetotacticum</i> | 72.04%                       | 59.85%                             | 54.83%                       | 71.32%                                  | 50.17%                  | 100%                                    | 40.85%                        | 95.06%                             | 41.10%                         |
| <i>Caulobacter crescentus</i>           | 45.87%                       | 43.72%                             | 54.48%                       | 51.25%                                  | 44.44%                  | 47.67%                                  | 100%                          | 41.52%                             | 40.49%                         |
| <i>Magnetospirillum magneticum</i>      | 70.96%                       | 59.49%                             | 54.83%                       | 72.04%                                  | 49.82%                  | 96.77%                                  | 48.38%                        | 100%                               | 41.27%                         |
| <i>Azospirillum brasilense</i>          | 51.61%                       | 43.72%                             | 54.12%                       | 54.48%                                  | 45.16%                  | 53.04%                                  | 50.89%                        | 53.76%                             | 100%                           |
