# Supplementary material for: The Polar Organizing Protein PopZ Is Fundamental for Proper Cell Division and Segregation of Cellular Content in Magnetospirillum gryphiswaldense
Source: PubMed Central journal article supplement (PMC6414705; doi:10.1128/mbio.02716-18), 2019-03-12

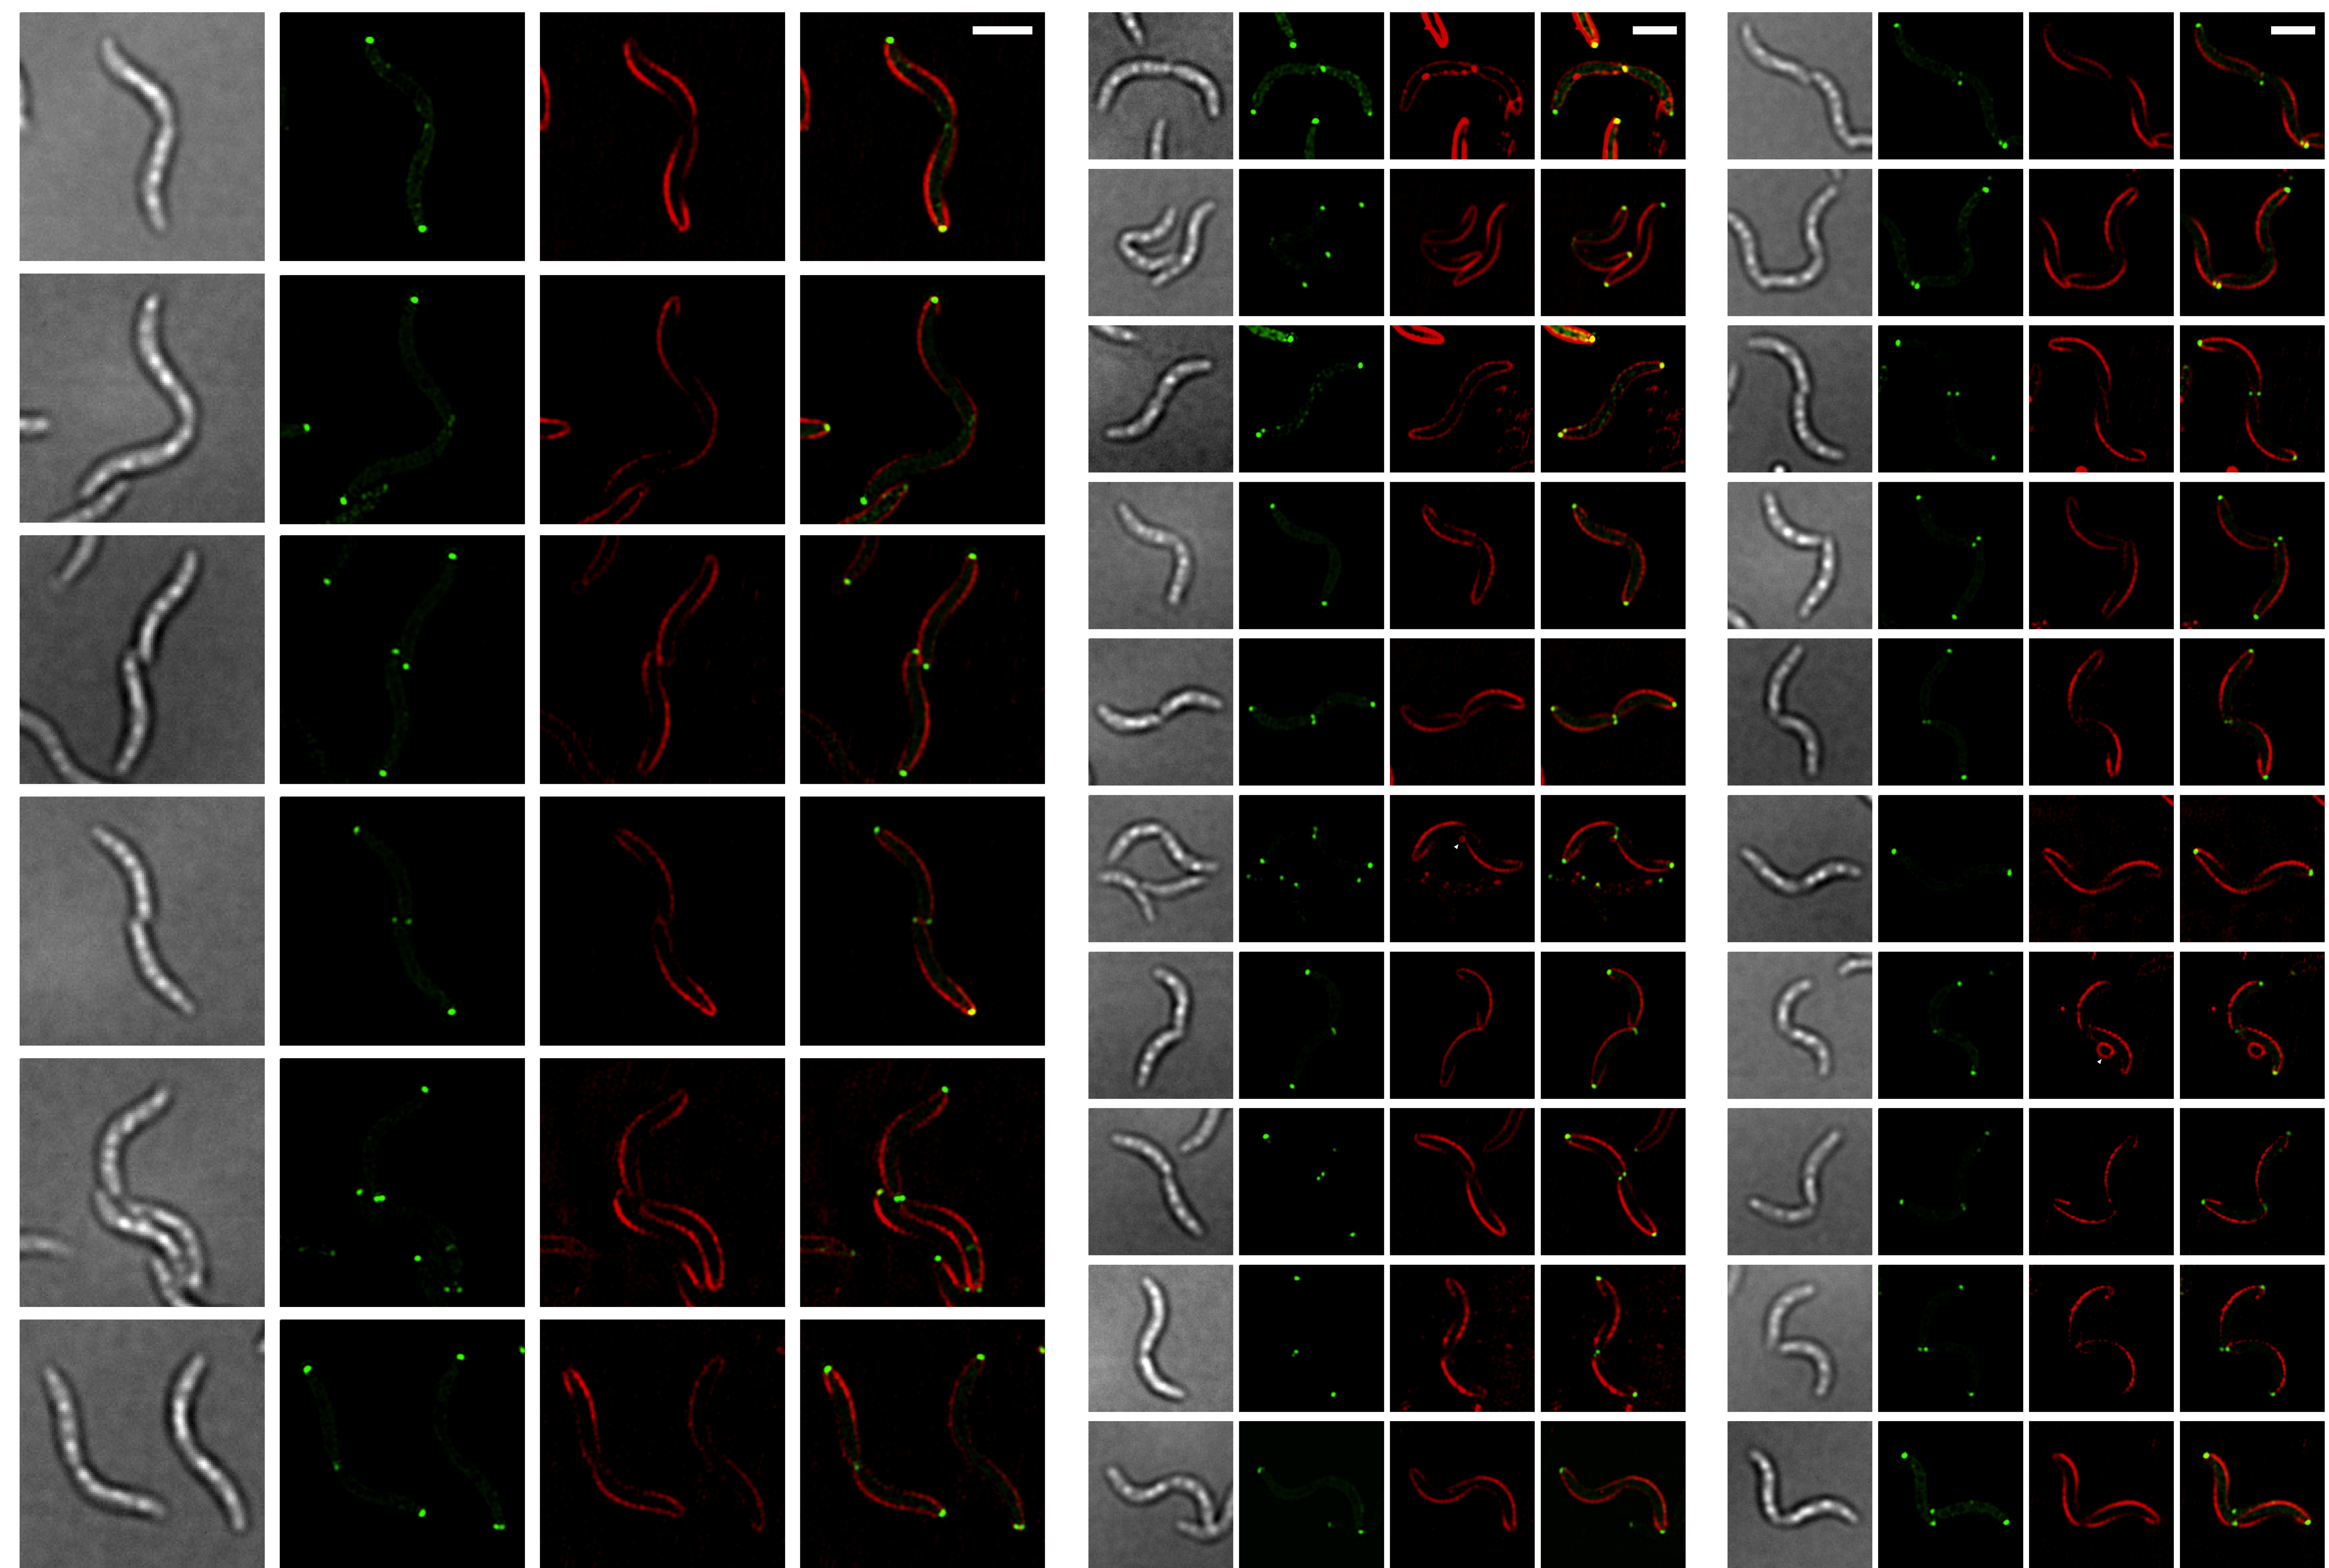

Supplement: mBio.02716-18-sf002.pdf [file mBio.02716-18-sf002.pdf]
